# Supplementary material for: Evolutionary safety of lethal mutagenesis driven by antiviral treatment
Source: PubMed Central journal article supplement (PMC10409280; doi:10.1371/journal.pbio.3002214), 2023-08-08
Supplement: pbio.3002214.s002.pdf [file pbio.3002214.s002.pdf]

# Evolutionary safety of lethal mutagenesis –S2 Text File: Step-by-step derivation of Eq. 22

Gabriela Lobinska<sup>1</sup>, Yitzhak Pilpel<sup>1\*</sup>, Martin A Nowak<sup>2\*</sup>

1 Department of Molecular Genetics, Weizmann Institute of Science, Rehovot 76100, Israel

2 Department of Mathematics, Department of Organismic and Evolutionary Biology, Harvard University, Cambridge MA 02138, USA

\*corresponding authors

$$V = \frac{(a_1 - a_0)e^{(bq^m - a_0)T}}{(bq^m - a_0)(a_1 - bq^m)}$$

$$X = \frac{(a_1 - a_0)e^{(bq^{m+n} - a_0)T}}{(bq^{m+n} - a_0)(a_1 - bq^{m+n})}$$

$$Y = V - X$$

Let us introduce the function:

$$F(x) = \frac{e^{bTq^x}}{(q^x - g_0)(g_1 - q^x)} \quad (1)$$

Here  $g_i = a_i/b$ . Notice that  $g_0 < 1 < g_1$ . We have

$$V = F(m) (g_1 - g_0) e^{-a_0T}$$

$$X = F(m+n) (g_1 - g_0) e^{-a_0T}$$

$$Y = [F(m) - F(m+n)](g_1 - g_0) e^{-a_0T}$$

Approximating  $q^x = (1 - u)^x \approx 1 - ux$  we get

$$F(x) = \frac{e^{bT(1-ux)}}{(1 - ux - g_0)(g_1 - 1 + ux)} \quad (2)$$

Let  $f_0 = 1 - g_0 > 0$  and  $f_1 = g_1 - 1 > 0$ . We get

$$F(x) = \frac{e^{bT(1-ux)}}{(f_0 - ux)(f_1 + ux)} \quad (3)$$

For  $ux \ll 1$  we get

$$F(x) = \frac{e^{-bTux} e^{bT}}{f_0 f_1 + ux(f_0 - f_1)} \quad (4)$$

Let  $h = bT$  and  $k = (f_0 - f_1)/(f_0 f_1)$ .

$$F(x) = \frac{e^{-hux}}{1 + kux} \frac{e^h}{f_0 f_1} \quad (5)$$

The derivative of  $F(m) - F(m + 1)$  with respect to  $u$  is  $[G(m + 1) - G(m)]e^h/(f_0f_1)$  where

$$G(x) = \frac{x(h + k + hkxu)e^{-hxu}}{(1 + kxu)^2}$$

The optimum of  $u$  is found by solving  $G(m) = G(m + 1)$  for  $u$ . We have

$$\frac{m(h + k + hkmu)e^{-hmu}}{(1 + kmu)^2} = \frac{(m + 1)(h + k + hk(m + 1)u)e^{-h(m+1)u}}{(1 + k(m + 1)u)^2}$$

Canceling  $e^{-hmu}$  we get

$$\frac{m(h + k + hkmu)}{(1 + kmu)^2} = \frac{(m + 1)(h + k + hk(m + 1)u)e^{-hu}}{(1 + k(m + 1)u)^2}$$

Approximating  $e^{-hu} \approx 1 - hu$  we get

$$\frac{m(h + k + hkmu)}{(1 + kmu)^2} = \frac{(m + 1)(h + k + hk(m + 1)u)(1 - hu)}{(1 + k(m + 1)u)^2}$$

Rearranging we get

$$\left(\frac{1 + kmu + ku}{1 + kmu}\right)^2 = \left(1 + \frac{1}{m}\right)(1 - hu)\frac{h + k + hkmu + hku}{h + k + hkmu}$$

Which is

$$\left(1 + \frac{ku}{1 + kmu}\right)^2 = \left(1 + \frac{1}{m}\right)(1 - hu)\frac{h + k + hkmu + hku}{h + k + hkmu}$$

Assuming  $\left(1 + \frac{ku}{1 + kmu}\right)^2 \approx 1 + \frac{2ku}{1 + kmu}$  we get

$$1 + \frac{2ku}{1 + kmu} = \left(1 + \frac{1}{m}\right)(1 - hu)\left(1 + \frac{hku}{h + k + hkmu}\right)$$

Multiplying on the RHS and neglecting higher terms we get

$$\frac{2ku}{1 + kmu} = \frac{1}{m} - hu + \frac{hku}{h + k + hkmu}$$

Multiplying with  $m$  we get

$$\frac{2kmu}{1 + kmu} = 1 - hmu + \frac{hkmu}{h + k + hkmu}$$

Rearranging we get

$$hmu + \frac{2kmu}{1 + kmu} - \frac{hkmu}{h + k + hkmu} = 1$$

Let  $x = mu$

$$hx + \frac{2kx}{1+kx} - \frac{h k x}{h+k+h k x} = 1$$

Which is equivalent to

$$h+k+x(h^2+k^2)+x^2hk(2h+k)+x^3h^2k^2=0$$
